# Supplementary material
Source: MDPI journal article supplement (https://www.mdpi.com/1996-1073/9/3/198)
Supplement: s2 [file s2]

# Supplementary Materials: Comparing the Bio-Hydrogen Production Potential of Pretreated Rice Straw Co-Digested with Seeded Sludge using an Anaerobic Bioreactor under Mesophilic and Thermophilic Conditions

Asma Sattar, Chaudhry Arslan, Ji Changying, Sumiyya Sattar, Irshad Ali Mari, Haroon Rashid and Fariha Ilyas

## Pretreatment of Rice Straw

In order to perform mechanical pretreatment, the rice straw was first cut into 6–8 cm lengths and placed in the grinder, after which, it was sieved.

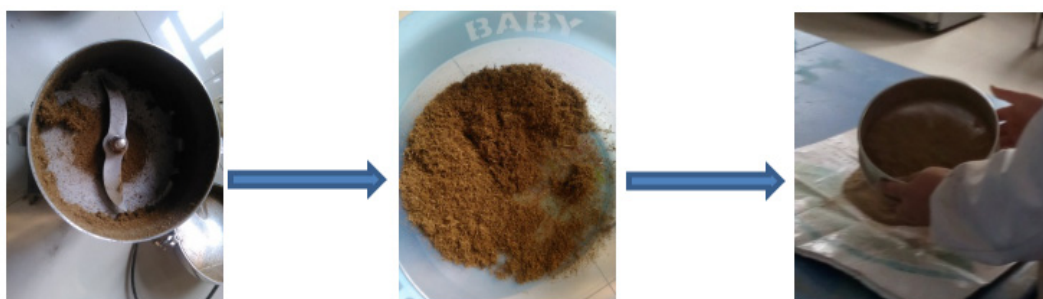

Figure S1. Steps for mechanical treatment.

For steam explosion, the straw was cut into 3–4 cm lengths, and water was added and mixed thoroughly many times to maintain a moisture content of 80%. After 3–4 h, the straw was placed into the steam explosion machine for the required treatment.

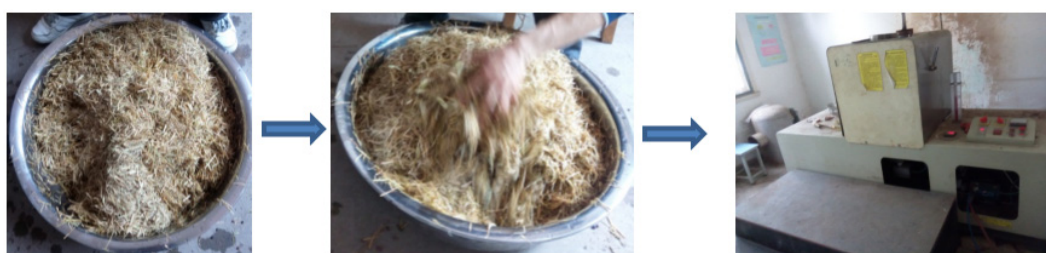

Figure S2. Preparation for steam explosion treatment.

For chemical treatment, the straw was made 5 mm–10 mm in size by another grinder, and water containing 6 g NaOH was thoroughly mixed and placed in beakers for three weeks.

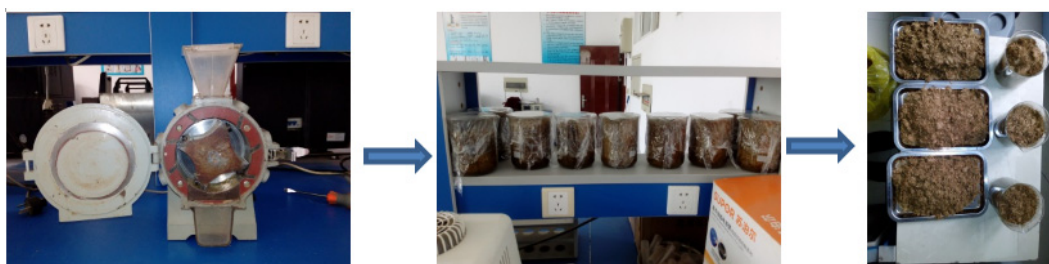

Figure S3. Chemical pretreatment.

After all of the treatments, the pretreated straw was added into a 20-L anaerobic reactor in an equal proportion of sludge for seven days.

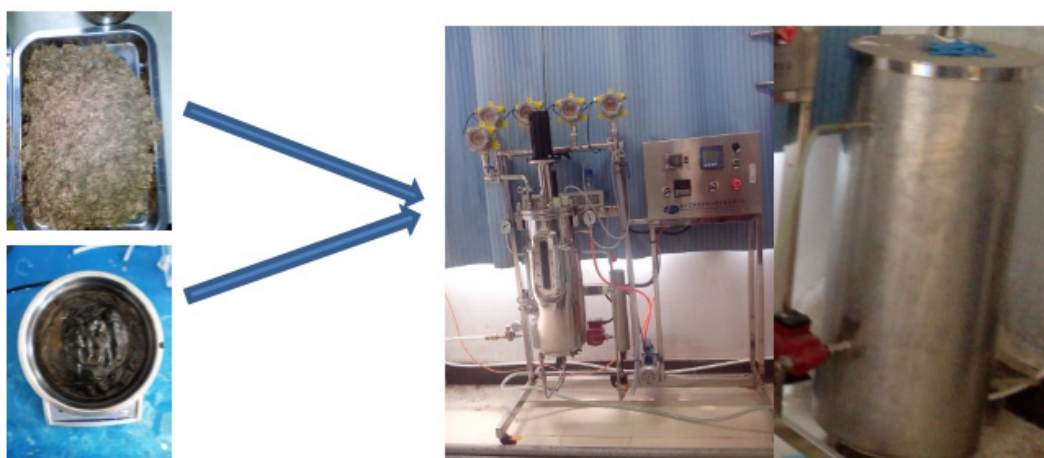

**Figure S4.** Treated rice straw and sludge in the anaerobic bioreactor.

**Table S1.** Average bio-hydrogen production.

| Time | 37 °C      |                 |          | 55 °C      |                 |          |
|------|------------|-----------------|----------|------------|-----------------|----------|
|      | Mechanical | Steam Explosion | Chemical | Mechanical | Steam Explosion | Chemical |
| 0    | 0          | 0               | 0        | 0          | 0               | 0        |
| 12   | 200        | 200             | 0        | 640        | 380             | 550      |
| 24   | 630        | 1170            | 600      | 1175       | 1545            | 1250     |
| 36   | 1230       | 2040            | 1920     | 1675       | 2445            | 2150     |
| 48   | 1680       | 2750            | 2870     | 2165       | 3305            | 3150     |
| 60   | 2130       | 3330            | 3730     | 2615       | 3900            | 4250     |
| 72   | 2530       | 3800            | 4460     | 3055       | 4400            | 5300     |
| 84   | 2880       | 4230            | 4960     | 3455       | 4840            | 6100     |
| 96   | 3180       | 4650            | 5370     | 3855       | 5250            | 6800     |
| 108  | 3470       | 5040            | 5715     | 4185       | 5640            | 7440     |
| 120  | 3720       | 5410            | 5925     | 4455       | 5915            | 7790     |
| 132  | 3920       | 5410            | 5925     | 4715       | 6065            | 7900     |
| 144  | 4050       | 5410            | 5925     | 4955       | 6065            | 7975     |
| 156  | 4050       | 5410            | 5925     | 5010       | 6065            | 7975     |
| 168  | 4050       | 5410            | 5925     | 5010       | 6065            | 7975     |
